# Supplementary material for: Aging-Related Accumulation of Truncated Oxidized Phospholipids Augments Infectious Lung Injury and Endothelial Dysfunction via Cluster of Differentiation 36-Dependent Mechanism
Source: MDPI journal article supplement (doi:10.3390/cells12151937), 2023-07-26
Supplement: s1 [file s1]

**Table S1. List of primer sequences used for RT-PCR**

| <b>Gene name</b>    | <b>Forward Primer</b>  | <b>Reverse Primer</b>    |
|---------------------|------------------------|--------------------------|
| Mouse TNF- $\alpha$ | CTGTAGCCCACGTCGTAGC    | TTGAGATCCATGCCGTTG       |
| Mouse IL-6          | CCGGAGAGGAGACTTCACAG   | TCCACGATTTCCCAGAGAAC     |
| Mouse IL-1 $\beta$  | GAAATGCCACCTTTTGACAGTG | TGGATGCTCTCAGGACAG       |
| Mouse CCL2          | GTTGGCTCAGCCAGATGCA    | AGCCTACTCATTGGGATCATCTTG |
| Mouse GAPDH         | AATGTGTCCGTCGTGGATCT   | AGACAACCTGGTCCTCAGTG     |
